# Supplementary material for: Histone H2A.Z Suppression of Interferon-Stimulated Transcription and Antiviral Immunity Is Modulated by GCN5 and BRD2
Source: PubMed Central journal article supplement (PMC6137307; doi:10.1016/j.isci.2018.07.013), 2018-07-20
Supplement: mmc1.pdf [file mmc1.pdf]

**ISCI, Volume 6**

**Supplemental Information**

**Histone H2A.Z Suppression of Interferon-Stimulated  
Transcription and Antiviral Immunity  
Is Modulated by GCN5 and BRD2**

**Nancy Au-Yeung and Curt M. Horvath**

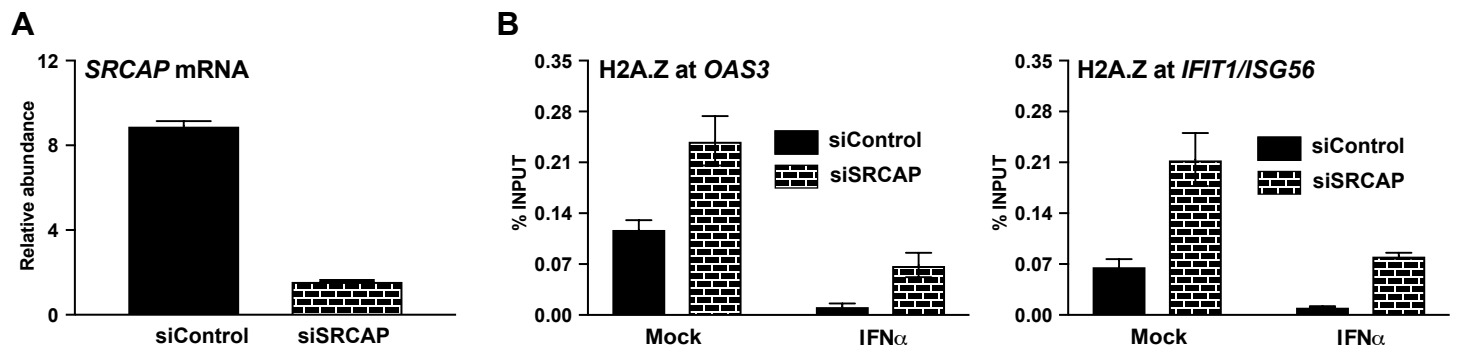

**Figure S1. SRCAP is not required for IFN-induced H2A.Z loss, Related to Figure 6**

(A-B) HeLa cells were transfected with siRNA against control (non-targeting sequence) or SRCAP. (A) *SRCAP* mRNA expression in control or SRCAP knockdown cells and normalized to GAPDH. (B) ChIP assay of H2A.Z occupancy at *OAS3* and *IFIT1/ISG56* promoters in control or *SRCAP* knockdown cells after mock or 3h IFN $\alpha$ -treated cells. Error bars denote mean  $\pm$  SD of a representative experiment with technical triplicates.

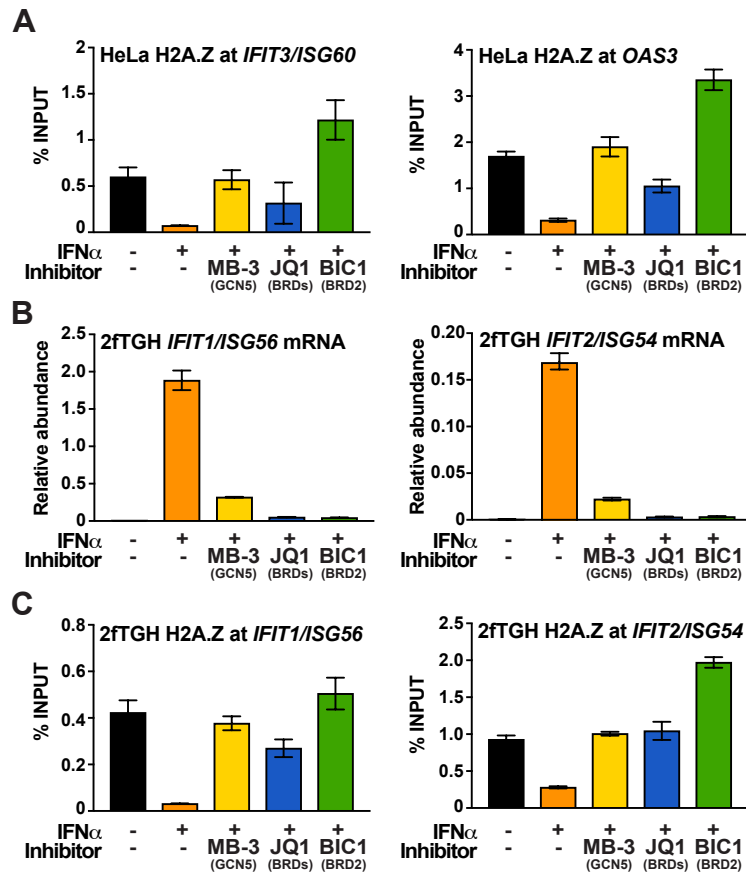

**Figure S2. GCN5 and BRD2 are essential to IFN-induced H2A.Z loss, Related to Figure 6**

(A) HeLa cells were pretreated with MB-3 or BET inhibitors JQ1 and BIC1 for 1h, mock-treated or stimulated with IFN $\alpha$  for 3h (+/- inhibitor), then analyzed for H2A.Z occupancy at *IFIT3/ISG60* and *OAS3*. Error bars denote mean  $\pm$  SD of a representative experiment with technical triplicates. (B-C) 2fTGH cells were pretreated with MB-3 or BET inhibitors JQ1 and BIC1 for 1h, mock-treated or stimulated with IFN $\alpha$  for 3h (+/- inhibitor), then analyzed for (B) *IFIT1/ISG56* and *IFIT2/ISG54* mRNA expression and (C) H2A.Z occupancy at *IFIT1/ISG56* and *IFIT2/ISG54*. Error bars denote mean  $\pm$  SD of a representative experiment with technical triplicates.

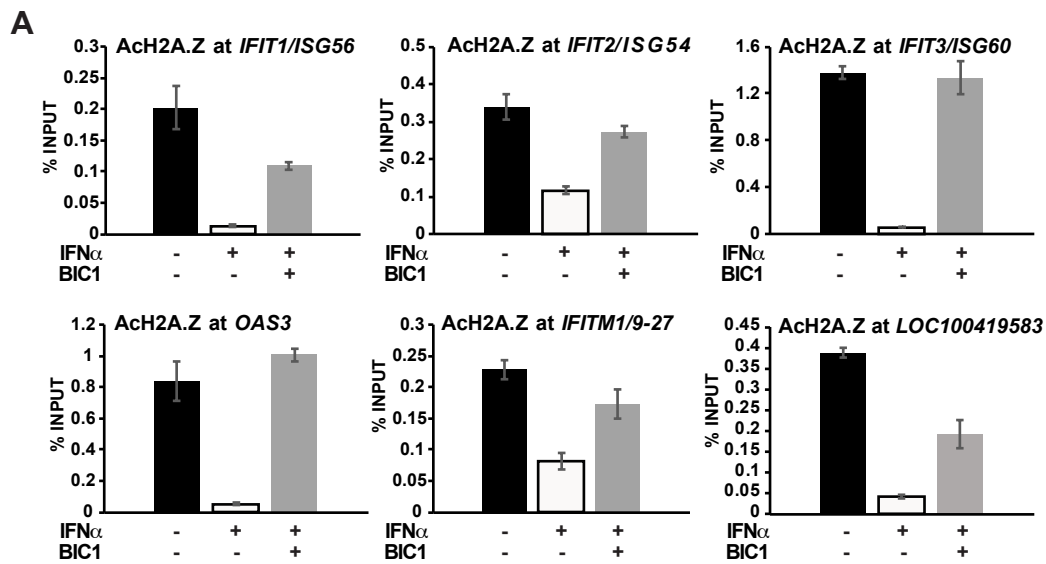

**Figure S3. IFN-stimulated acetylated H2A.Z loss requires BRD2, Related to Figure 6**

(A) ChIP analysis of acetylated H2A.Z (K4, K7, K11) after mock, 3h IFN $\alpha$  or 1h pre-incubation with BIC1 followed by 3h IFN $\alpha$ /BIC1 treatment at the gene promoters of *IFIT1/ISG56*, *IFIT2/ISG54*, *IFIT3/ISG60*, *OAS3*, *IFITM1/9-27* and *LOC100419583*. Error bars denote mean  $\pm$  SD of a representative experiment with three technical replicates.

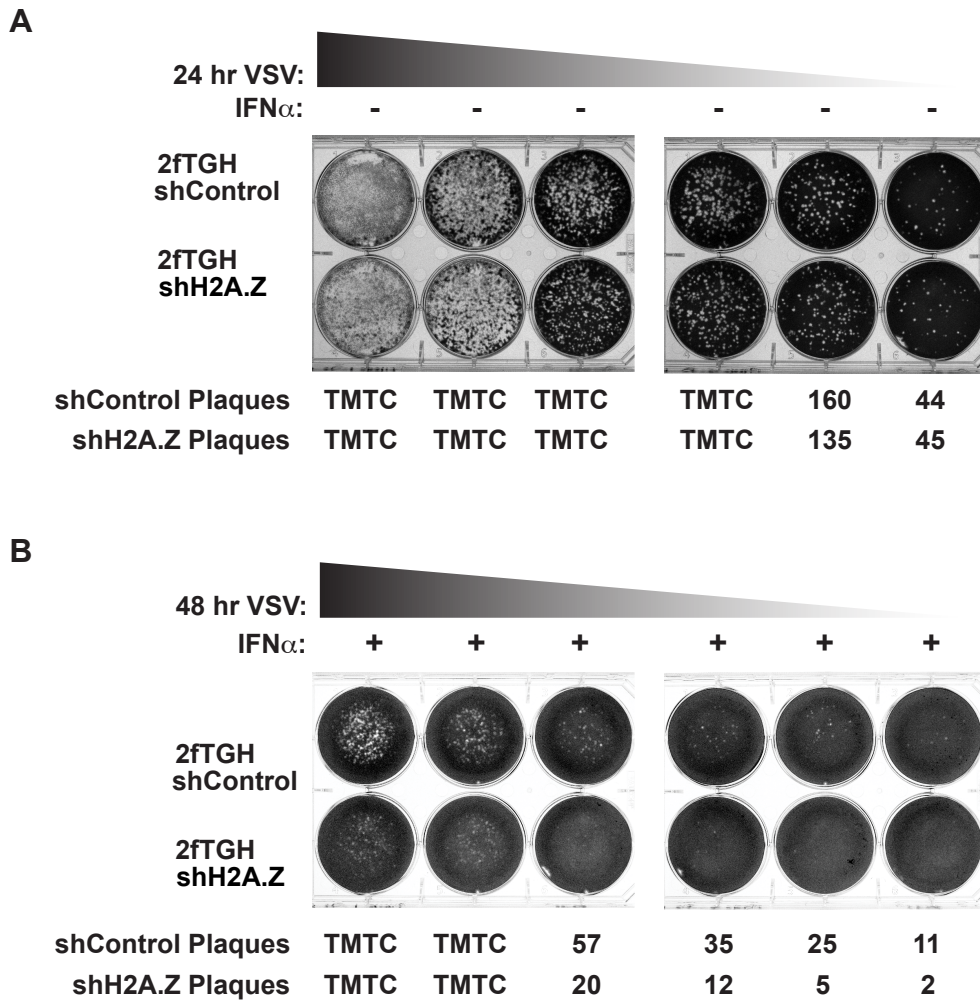

**Figure S4. Loss of H2A.Z does not alter VSV replication, Related to Figure 7**

(A) Plaque assay in 2fTGH cells harboring shRNA non-targeting control or H2A.Z shRNA. Cells were inoculated with a VSV titration for 1.5h as in Figure 7F, but with no IFN stimulation, and overlaid with 2% DMEM-agar at 37°C for 24h before staining with crystal violet. (B) Plaque assay of 2fTGH cells harboring shRNA non-targeting control or H2A.Z shRNA. Cells were treated for 9h with IFN $\alpha$  before inoculation with VSV as in Figure 7F, and incubated for 48h before staining with crystal violet. TMTC, too many to count.

**A**

| Gene                 | Known ISGF3 Targets | Cluster | Locus                         | Gene Size (bp) | Total Nucleosomes | Nucleosomes per bp |
|----------------------|---------------------|---------|-------------------------------|----------------|-------------------|--------------------|
| <i>IFIT1 (ISG56)</i> | ✓                   | ✓       | chr10:91,152,322-91,163,742   | 11,420         | 64                | 0.0056             |
| <i>IFIT2 (ISG54)</i> | ✓                   |         | chr10:91,061,706-91,069,032   | 7,326          | 35                | 0.0048             |
| <i>IFIT3 (ISG60)</i> | ✓                   |         | chr10:91,092,239-91,100,724   | 8,485          | 47                | 0.0055             |
| <i>IFIT5</i>         |                     |         | chr10:91,174,325-91,180,758   | 6,433          | 21                | 0.0033             |
| <i>ISG15</i>         | ✓                   |         | chr1:948,847-949,915          | 1,068          | 6                 | 0.0056             |
| <i>IFITM1 (9-27)</i> | ✓                   | ✓       | chr11:313,991-315,271         | 1,280          | 6                 | 0.0047             |
| <i>IFITM2</i>        |                     |         | chr11:308,107-309,409         | 1,302          | 9                 | 0.0069             |
| <i>IFITM3 (1-8U)</i> | ✓                   |         | chr11:319,673-320,914         | 1,241          | 10                | 0.0081             |
| <i>IFITM5</i>        |                     |         | chr11:298,203-299,526         | 1,323          | 7                 | 0.0053             |
| <i>OAS1</i>          | ✓                   | ✓       | chr12:113,344,739-113,357,711 | 12,972         | 66                | 0.0051             |
| <i>OAS2</i>          | ✓                   |         | chr12:113,416,274-113,449,527 | 33,253         | 172               | 0.0052             |
| <i>OAS3</i>          | ✓                   |         | chr12:113,376,249-113,411,052 | 34,803         | 177               | 0.0051             |
| <i>MX1</i>           | ✓                   | ✓       | chr21:42,797,978-42,831,140   | 33,162         | 165               | 0.0050             |
| <i>MX2</i>           | ✓                   |         | chr21:42,733,950-42,780,869   | 46,919         | 227               | 0.0048             |
| <i>STAT1</i>         |                     |         | chr2:191,833,762-191,878,976  | 45,214         | 222               | 0.0049             |
| <i>STAT2</i>         |                     |         | chr12:56,735,384-56,753,909   | 18,525         | 85                | 0.0046             |
| <i>IFI6 (6-16)</i>   | ✓                   |         | chr1:27,992,572-27,998,724    | 6,152          | 23                | 0.0037             |
| <i>AIM2</i>          |                     | ✓       | chr1:159,032,275-159,046,647  | 14,372         | 61                | 0.0042             |
| <i>IFI16</i>         |                     |         | chr1:158,979,682-159,024,943  | 45,261         | 204               | 0.0045             |
| <i>IFI27</i>         | ✓                   |         | chr14:94,577,079-94,583,033   | 5,954          | 30                | 0.0050             |

**B**

|                                     | Total reads        | Unique reads      | 137-157 bp reads | Read coverage (fold) |
|-------------------------------------|--------------------|-------------------|------------------|----------------------|
| <b>Mock</b>                         | <b>104,796,614</b> | <b>55,463,526</b> | <b>6,720,135</b> | <b>562</b>           |
| <b>2 hr IFN<math>\alpha</math></b>  | <b>106,756,227</b> | <b>56,949,366</b> | <b>4,302,688</b> | <b>360</b>           |
| <b>6 hr IFN<math>\alpha</math></b>  | <b>94,274,867</b>  | <b>51,243,148</b> | <b>5,050,067</b> | <b>422</b>           |
| <b>10 hr IFN<math>\alpha</math></b> | <b>103,862,266</b> | <b>55,437,595</b> | <b>7,280,912</b> | <b>608</b>           |

**Table S2. Direct selection nucleosome selection criteria and sequencing analysis, Related to Figure 2**

(A) Summary of the rationale in selecting 20 representative ISGs for nucleosome profiling and characterization of the ISG nucleosome composition (total nucleosomes, average nucleosome per bp). (B) Total and unique sequencing reads from each sample and the read enrichment calculated from (number of reads x 147 bp)/(1758135 bp length of BACs).

**Table S3. Reagents, qPCR Primers and Plasmids, Related to Figures 1, 2, 3, 4, 5, 6, 7, S1, S2, S3**

**mRNA/cDNA RT-PCR Primers**

|              | <b>Forward Primer</b>  | <b>Reverse Primer</b> |
|--------------|------------------------|-----------------------|
| H2A.Z        | CTCACCGTGGGTCCGATTAG   | CGCCTTTGTCTTGGCCTTTC  |
| OAS3         | TTCATCCAGGACCACCTGA    | GCCAAATGAGCCCCCTTTAC  |
| IFIT1/ISG56  | CAGAACGGCTGCCTAATTT    | GGCCTTTCAGGTGTTTCAC   |
| IFIT2/ISG54  | GGAAGATTTCTGAAGAGTGCAG | CTCCCTCCATCAAGTTCCAG  |
| IFITM1/9-27  | CCTTCCAAGGTCCACCGT     | ACGTCGCCAACCATCTTC    |
| LOC100419583 | GCTTGCTCAGGTCTCTGTCC   | CTGCCCGGTAGTTATTCAGC  |
| ISG15        | GACCTGACGGTGAAGATGCT   | CGATCTTCTGGGTGATCTGC  |
| GAPDH        | ACAGTCAGCCGCATCTTCTT   | ACGACCAAATCCGTTGACTC  |

**Genomic DNA/ChIP RT-PCR Primers**

|                        | <b>Forward Primer</b>      | <b>Reverse Primer</b> |
|------------------------|----------------------------|-----------------------|
| OAS3 promoter          | CAAGTTTGGGGAAGACAGGA       | TCGGATTTCTGGTTTCGTTT  |
| OAS3 gene body         | AAAGCCAGCCAGTGAACAGT       | ATCCAAGCCACTCTCCTCAA  |
| IFIT1/ISG56 promoter   | GCAGGAATTCCGCTAGCTTT       | GCTAAACAGCAGCCAATGGT  |
| IFIT1/ISG56 gene body  | CCTCCTTGGGTTCTGTCTACA      | GGCTGATATCTGGGTGCCTA  |
| IFITM1/9-27 promoter   | CAGCAGGAAATAGAACTTAAGAGAAA | GGGGAAGGAAGTGTGAGTG   |
| IFITM1 /9-27 gene body | CTGATTCTGGGCATCCTCAT       | AGGCTATGGGCGGCTACTA   |
| LOC100419583 promoter  | TTGCTGATCTCATCACTGCAT      | ACTTTCCTGCTCCTGGTTTCT |
| ISG15 promoter         | CGTGTGTGCCTCAGGCTTAT       | ACGGCACAAGCTCCTGTACT  |
| IFIT3/ISG60 promoter   | ATTTTCCTCCTCCCAACGAT       | GAGAGTAGGGCACGCATCAG  |
| $\beta$ Actin promoter | CTGGGTTCTGTACGCTCCTG       | GACCCACCCAGCACATTTAG  |

**Plasmids or siRNA**

|              | <b>Sequence</b>     | <b>Clone ID</b> |
|--------------|---------------------|-----------------|
| shRNA: H2AFZ | CGTATTCATCGACACCTAA | V2LHS_132986    |
| shRNA: H2AFZ | GCCGTATTCATCGACACCT | V2LHS_132984    |

|                      |                                   |                  |
|----------------------|-----------------------------------|------------------|
| shRNA: H2AFZ         | CCGTATTCATCGACACCTA               | V2LHS_132985     |
| shRNA: Non-silencing | N/A                               | RHS 4346         |
| shRNA: INO80         | ATTTCTTCCAGTACAGAAG               | V2LHS_238013     |
| shRNA: RVB1          | TTAGCAAGCAAGTTGGCCG               | V2LHS_14740      |
| shRNA: RVB2          | TGCTGGTTCGATCAATCTGG              | V3LHS_641743     |
| shRNA: CBP           | TAAGTGATAATATTCATCC               | V2LHS_24251      |
| siRNA: SRCAP         | Dharmacon On-TARGETplus SMARTpool | L-004830-00-0005 |

### Bacterial artificial chromosomes (BAC)

| BAC          | BAC start-end               | Hybridization ISG target(s)    |
|--------------|-----------------------------|--------------------------------|
| RP11-1065J8  | Chr1: 158892666- 159066838  | IFI16, AIM2                    |
| RP11-1107P24 | Chr10: 91017523- 91231100   | IFIT1, IFIT2, IFIT3, IFIT5     |
| RP11-932J23  | Chr12: 113297537- 113465374 | OAS1, OAS2, OAS3               |
| RP11-120C17  | Chr21: 42708733- 42858453   | MX1, MX2                       |
| CTD-2344F1   | Chr11: 212684- 355505       | IFITM1, IFITM2, IFITM3, IFITM5 |
| CTD-3113J13  | Chr1: 838835- 1031922       | ISG15                          |
| RP11-553K16  | Chr1: 27887559-28085894     | IFI6                           |
| RP11-641G12  | Chr2: 191780297- 191951049  | STAT1                          |
| RP11-348M3   | Chr12: 56684981- 56848839   | STAT2                          |
| RP11-668H1   | Chr14: 94486463- 94670429   | IFI27                          |



## TRANSPARENT METHODS

### Cell culture and treatment with interferon or chemical inhibitor

Human cells lines, HeLa S3, 293T/17, 2fTGH, U2A, U3A and U6A cells were grown in Dulbecco's modified Eagle's medium (DMEM) containing 10% cosmic calf serum (CCS) and 1% pen-strep (PS) at 37°C with 5% CO<sub>2</sub>. Lentiviral-transduced HeLa or 2fTGH cells harboring shRNA were cultured in DMEM containing 10% CCS, 1% PS and 5-10 µg/ml puromycin (Sigma, St. Louis, MO) at 37°C with 5% CO<sub>2</sub>. Cells were mock-treated or treated with 1000 units/ml of IFN $\alpha$  (Hoffman-Roche) for the specified amount of time. Chemical inhibitors, PFI-3 (0.9 mM, Sigma), TSA (1.3 mM; EMD Millipore, Burlington, MA), MB-3 (0.5 mM, Sigma), JQ1 (10 µM; Apexbio, Houston, TX), and BIC1 (0.5 mM, Sigma) were added 1h pre-IFN treatment and not removed during IFN treatment. See Table S3 and Key Resources Table for reagent details.

### mRNA Expression

RNA was isolated from cells with Trizol, extracted with phenol/chloroform and isopropanol-precipitated. RNA was treated with DNase I, primed with random primers and reverse transcribed to cDNA with Superscript III (Invitrogen, Carlsbad, CA). Relative mRNA abundance was determined by SYBR green qPCR (Invitrogen) using specific primers. Analysis was based on the delta Ct method using GAPDH to normalize for relative abundance. Statistical analysis was computed using the Student's t-test with  $n \geq 3$ . See Table S3 and Key Resources Table for reagent details.

### Lentivirus-mediated RNA interference

293T/17 cells were transfected with pGIPZ lentiviral short hairpin RNA vectors, p $\Delta$ 8.91 and pUC-MDG using either lipofectamine 2000 or polyethylenimine in DMEM media for 15h followed by a change to DMEM media supplemented with 10% CCS and 1% PS for 24h. Lentivirus-containing supernatant was centrifuged and filtered to remove cell debris. HeLa or 2fTGH cells were transduced 2-3 times with fresh lentivirus and polybrene for 24h each time. See Table S3 and Key Resources Table for reagent details.

### siRNA-mediated RNA interference

HeLa or 2fTGH cells were transfected with 40 nM siRNA using lipofectamine 2000 for 48 hr. Cells were mock- or IFN-treated and harvested by Trizol for RNA analysis or processed for CHIP sample preparation. See Table S3 and Key Resources Table for reagent details.

### Antiviral plaque assay

Lentivirus-shRNA-transduced HeLa or 2fTGH cells were mock-treated or treated with 1000 units/ml of IFN $\alpha$  for the specified amount of time, then infected with vesicular stomatitis virus (Indiana strain) for 24-72h at 37°C with 5% CO<sub>2</sub>. Cells were fixed with 3.7% formaldehyde and stained with crystal violet.

### Immunoblot

Cells were lysed on ice in whole cell extract buffer (50 mM Tris pH 8.0, 280 mM NaCl, 0.5% Igepal, 0.2 mM EDTA, 2 mM EGTA, 10% glycerol) supplemented with fresh DTT, protease inhibitor and sodium vanadate for 15-30 min, then sonicated for 5 minutes (15 sec on, 45 sec off) at 4°C using a cuphorn sonicator (Misonix). The sonicated sample was centrifuged at 14,000 x g for 15 minutes to remove the cellular debris. Total protein was denatured at 100°C in SDS loading buffer, separated by SDS-PAGE, transferred to nitrocellulose membrane, blocked in milk/TBST solution, probed with specific antibody (H2A.Z ab4174 Abcam, Cambridge, MA; GAPDH sc-47724 Santa Cruz, Dallas, TX; STAT1 Santa Cruz sc-345, STAT2 sc-476) and the corresponding HRP

conjugated secondary antibody (Invitrogen). Chemiluminescent detection (PerkinElmer, Waltham, MA) was performed using Vision Works software. Relative density was quantified using ImageJ software. See Table S3 and Key Resources Table for reagent details.

### **ChIP sample preparation**

Chromatin immunoprecipitation (ChIP) samples were prepared according to Lee et al., 2006. Adherent cells were crosslinked for 10 minutes with 11% formaldehyde solution (50 mM HEPES-KOH pH 7.5, 100 mM NaCl, 1 mM EDTA pH 8.0, 0.5 mM EGTA pH 8.0, 11% formaldehyde) and quenched for 5-10 minutes with glycine at room temperature. Crosslinked cells were lysed at 4°C with lysis 1 buffer (50 mM HEPES-KOH pH 7.5, 140 mM NaCl, 1 mM EDTA, 10% glycerol, 0.5% NP-40, 0.25% Triton X-100, 1X protease inhibitors), pelleted to isolate the nuclei, washed with lysis 2 buffer (10 mM Tris-HCl pH 8.0, 200 mM NaCl, 1 mM EDTA, 0.5 mM EGTA, 1x protease inhibitors) and pelleted. Nuclei was resuspended in lysis buffer 3 (10 mM Tris-HCl pH 8.0, 100 mM NaCl, 1 mM EDTA, 0.5 mM EGTA, 0.1% Na-Deoxycholate, 0.5% N-lauroylsarcosine, 1X protease inhibitors) and sonicated at 4°C with intervals of 15 seconds on and 45 seconds off until DNA fragments were  $\leq 1000$  bp. Triton-X was added to the sonicated lysate to a final concentration of 1% and centrifuged to pellet the cell debris. The cleared lysate was removed and 1% input sample was saved. The lysate was incubated with Dynabeads bound to antibody (STAT1 Santa Cruz sc-345, STAT2 Santa Cruz sc-476, IRF9 Santa Cruz sc-496, RNA Pol II CTD Abcam ab817, H2A.Z Abcam ab4174, H2A Abcam ab18255, H2B Abcam ab1790, H3 Abcam ab1791, H4 Abcam ab7311) overnight at 4°C followed by 5 times wash with cold RIPA buffer (50 mM HEPES pH 7.5, 500 mM LiCl, 1 mM EDTA, 1% NP-40, 0.7% Na-Deoxycholate) and once with cold Tris-EDTA (TE) pH 8.0 + NaCl. Immunoprecipitated complexes were eluted off the beads with 30 minutes of 65°C water bath incubation and periodic vortexing. The eluate was further incubated in a 65°C heated incubator for 12-15h. TE buffer was added to the reverse-crosslinked sample and incubated with RNase A for 2h at 37°C, Proteinase K for 2h at 55°C and isolated with phenol:chloroform:isoamyl. The sample was eluted with ethanol (EtOH), glycogen and NaCl at -20°C overnight, washed with 80% EtOH and resuspended in Tris-HCl pH 8.0. ChIP DNA was used either for qPCR assays using specific primers or prepared into a sequencing library for Applied Biosystems (ABI, Foster City, CA) SOLiD 5500xl sequencing. See Key Resources Table for reagent details.

### **ChIP library preparation for SOLiD 5500xl sequencing**

The purified ChIP DNA was prepared for sequencing following ABI SOLiD 5500xl library preparation protocol. Purified DNA was end-repaired (NEBNext; NEB, Ipswich, MA). The DNA was size-selected with Ampure beads followed by addition of a single dA-tail to the ends. ABI SOLiD 5500xl DNA adaptor barcodes were ligated onto the DNA with Quick Ligase (NEB) for 30 minutes at room temperature and size-selected with Ampure beads. Size-selected DNA was pseudo nick-translated to fill in the 5' overhang and remove the 3' end (NEBNext). Ampure beads was used to purify the final adaptor-ligated ChIP DNA. The adaptor-ligated ChIP DNA library was amplified for 11-13 cycles using the SOLiD P1 and P2 primers and DNA size was verified by Bioanalyzer. See Key Resources Table for reagent details.

### **ChIP assays, deep sequencing and data analysis**

ChIP and input DNA abundance was analyzed using SYBR green qPCR for ChIP assays. ChIP DNA was normalized using the percent input method. Statistical analysis was computed using the Student's t-test with  $n \geq 2$ . For high-throughput sequencing, ChIP DNA was prepared following the SOLiD 5500xl library preparation protocol. Reads were aligned to the human hg19 build with Bioscope v1.3.1. The reference genome was converted to colorspace. MACS software was used to identify unique peaks. Genomic regions that were statistically enriched in the ChIP-Seq data ( $p$ -value  $\leq 1 \times 10^{-5}$ ) relative to the control input DNA were identified by the MACS software (Zhang

et al., 2008), and represent regions bound by IFN-induced STAT1, STAT2 or IRF9. Additional data analysis was performed with the HOMER software.

### **Direct selection MNase nucleosome preparation, deep sequencing and data analysis**

Mononucleosome DNA (mnDNA) from (~147-167 bp) was isolated, processed and sequenced as described in Freaney et al., 2014 and Yigit et al., 2013. Briefly, a sequencing library was prepared with isolated mononucleosome DNA (mnDNA) and ligated with SOLiD 5500xl adaptor DNA barcodes. The sequencing library was hybridized to 10 biotin-labeled bacteria artificial chromosomes (BACs; BACPAC Resources, Oakland, CA) to enrich for 20 target interferon-stimulated gene genomic loci. The target DNA was captured and eluted from streptavidin-conjugated beads. The eluted library was amplified for 13-15 cycles using SOLiD P1 and P2 primers and paired-end sequenced on the SOLiD 5500xl platform. See Table S3 and Key Resources Table for reagent details.

To obtain mnDNA, crude nuclei was isolated from HeLa cells. Approximately  $5 \times 10^7$  adherent HeLa cells were pelleted, washed, and lysed with MC lysis buffer (10 mM Tris-HCl pH 7.5, 10 mM NaCl, 3 mM MgCl<sub>2</sub>, 0.5% Igepal). The nuclear pellet was resuspended in micrococcal nuclease (MNase) reaction buffer (10 mM Tris-HCl pH 7.5, 10 mM NaCl, 3 mM MgCl<sub>2</sub>, 1 mM CaCl<sub>2</sub>, 4% Igepal, fresh 1 mM PMSF). MNase (800 units/ $5 \times 10^7$  cells) was added to the nuclear pellet and digested the chromatin for the appropriate amount of time to generate mononucleosome DNA at 25°C. The digestion reaction was terminated with addition of a stop reaction solution (10 mM EGTA, 1X PMSF, 1X PI, 1% SDS, 200 mM NaCl or 10 mM EDTA). The digested chromatin sample was treated with RNase A for 30 min at 37°C followed by a phenol/chloroform extraction to obtain the DNA. The DNA (~1.5 µg) was loaded onto a 3.5% NuSieve 3:1 agarose gel in 0.5% TBE solution to resolve the nucleosomal DNA bands. The mononucleosomal-sized DNA (mnDNA) band (~147 bp) was excised from the gel and isolated by the crush and soak method. Briefly, the gel was incubated with 3 times volume to gel of crush and soak buffer (300 mM NaOAc, 1 mM EDTA pH 8.0, 0.1% SDS) with gentle shaking at room temperature overnight. The crush and soak buffer containing the mnDNA was filtered (Amicon Ultrafree-CI) and the filtrate was concentrated. The concentrated mnDNA was purified and used to prepare the sequencing library.

The purified mnDNA was prepared for sequencing following ABI SOLiD 5500xl library preparation protocol. Purified mnDNA was end-repaired. The DNA was size-selected (~147 bp) with Ampure beads followed by addition of a single dA-tail to the ends. ABI SOLiD 5500xl DNA adaptor barcodes were ligated onto the DNA with Quick Ligase for 30 minutes at room temperature and size-selected with Ampure beads. Size-selected DNA was pseudo nick translated to fill in the 5' overhang and remove the 3' end. Ampure beads was used to purify the adaptor-ligated mnDNA.

To enrich for mnDNA from 20 target ISG genomic regions, bacterial artificial chromosomes (BACs) encoding these regions were used to hybridize and enrich the target ISGs. The 10 biotin-dUTP-labeled BACs allows capture of ~1.76 Mb of the genome corresponding to 20 ISG loci and their surrounding genomic regions. The lyophilized biotin-dUTP-labeled BACs was resuspended with human *cot-1* DNA to reduce nonspecific repetitive DNA sequences with a mineral oil overlay, followed by denaturation at 95°C for 5 min, incubated at 65°C for 15 min, and then incubated with 5 µl of 2X hybridization buffer (1.5 M NaCl, 40 mM sodium phosphate buffer pH 7.2, 10 mM EDTA pH 8, 10X Denhardt's, 0.2% SDS) at 65°C for 6h. Then 2 µg of the adaptor-ligated mnDNA in 5 µl of dH<sub>2</sub>O was denatured at 95°C for 5 min and incubated at 65°C for 15 min with a mineral oil overlay. The mnDNA was transferred to a tube containing the *cot-1* suppressed BACs and allowed to hybridize with the BACs at 65°C for 72h. The hybridization mixture of BAC and mnDNA

was added to pre-washed streptavidin magnetic beads in 150  $\mu$ l Streptavidin bead binding buffer. Binding of the streptavidin magnetic beads with the biotin-dUTP labeled BAC hybridized with mnDNA was carried out on a rotator at room temperature for 30 min with periodic mixing. The magnetic beads were washed once with 1 ml 1 $\times$  sodium-saline citrate (SSC) buffer with 0.1% SDS at 25°C for 15 min, and then three times with 1 ml 0.1 $\times$  SSC buffer with 0.1% SDS. The hybridized BAC-mnDNA was eluted off the streptavidin beads with 100  $\mu$ l of 0.1 M NaOH at 25°C for 10 min. The BAC-mnDNA eluate was neutralized by addition of 100  $\mu$ l 1M Tris-HCl pH 7.5 and desalted through a Sephadex G-50 column. The eluted mnDNA was PCR-amplified for 13-15 cycles using the SOLiD P1 and P2 primers.

Sequencing reads were aligned with the Bowtie software v0.12.7 using the human reference genome build hg19/GR37. Aligned reads corresponding to the BAC-selected genomic coordinates were used to generate nucleosome occupancy maps using a center-weighted algorithm and selecting reads that were 137-157 bp, representing single nucleosome-protected regions (Freaney et al., 2014; Yigit et al., 2013). The occupancy scores from the center-weighted algorithm was normalized to 10 million reads to generate nucleosome occupancy maps. To identify nucleosome occupancy changes between the steady state and different time points of IFN-induced states, additional analysis was performed using the DANPOS software (Chen et al., 2013).

#### KEY RESOURCE TABLE

| REAGENT or RESOURCE                                        | SOURCE                    | IDENTIFIER              |
|------------------------------------------------------------|---------------------------|-------------------------|
| <b>Antibodies</b>                                          |                           |                         |
| STAT1                                                      | Santa Cruz                | sc-345                  |
| STAT2                                                      | Santa Cruz                | sc-476                  |
| IRF9                                                       | Santa Cruz                | sc-496                  |
| H2A.Z                                                      | Abcam                     | ab4174                  |
| RNA Pol II CTD                                             | Abcam                     | ab817                   |
| H2A                                                        | Abcam                     | ab18255                 |
| H2B                                                        | Abcam                     | ab1790                  |
| H3                                                         | Abcam                     | ab1791                  |
| H4                                                         | Abcam                     | ab7311                  |
| Phospho-STAT1 (Tyr 701)                                    | Cell Signaling Technology | 7649                    |
| Phospho-STAT2 (Tyr 689)                                    | EMD Millipore             | 07-224                  |
| H2A.Z Acetyl K4, K7, K11                                   | Abcam                     | Ab18262                 |
| GAPDH                                                      | Santa Cruz                | sc-47724                |
| <b>Bacterial and Virus Strains</b>                         |                           |                         |
| Vesicular stomatitis virus                                 | N/A                       | Indiana strain          |
| Lentivirus (pUC-MDG, p $\Delta$ 8.91, harbors pGIPz shRNA) | This paper                | See Table S3 - Plasmids |
| <b>Chemicals, Peptides, and Recombinant Proteins</b>       |                           |                         |
| Dynabeads Protein G                                        | Invitrogen                | 10004D                  |
| IFN $\alpha$                                               | Hoffmann-La Roche Inc     | RO 22-8181/001          |
| PFI-3                                                      | Sigma Aldrich             | SML0939                 |
| MB-3                                                       | Sigma Aldrich             | M2449                   |
| JQ1                                                        | Fisher Scientific/Apexbio | 50-101-4886             |

|                                                      |                                          |                                                                                                                                               |
|------------------------------------------------------|------------------------------------------|-----------------------------------------------------------------------------------------------------------------------------------------------|
| BIC1                                                 | Sigma Aldrich                            | 203830                                                                                                                                        |
| TSA                                                  | EMD Millipore                            | 647925                                                                                                                                        |
| iProof HF DNA Polymerase                             | Biorad                                   | 172-5302                                                                                                                                      |
| <b>Critical Commercial Assays</b>                    |                                          |                                                                                                                                               |
| SOLiD library preparation: Fragment Library Core Kit | Applied Biosystems                       | 4464412                                                                                                                                       |
| SOLiD library preparation: Enzyme Module             | Applied Biosystems                       | 4464413                                                                                                                                       |
| SOLiD library preparation: Barcode adapters          | Applied Biosystems                       | 4464406                                                                                                                                       |
| SOLiD library preparation: Standard adapter kit      | Applied Biosystems                       | 4464411                                                                                                                                       |
| NEBNext: END Repair Module                           | NEB                                      | E6050L                                                                                                                                        |
| NEBNext: dA-Tailing Module                           | NEB                                      | E6053L                                                                                                                                        |
| <b>Deposited Data</b>                                |                                          |                                                                                                                                               |
| STAT1, STAT2, IRF9 ChIP-Seq data (HeLa cells)        | This paper                               | GEO: GSE110067                                                                                                                                |
| H2A.Z Encode data (HeLa cells)                       | (ENCODE Project Consortium, 2012)        | UCSC: wgEncodeEH002395; GEO: GSM1003483<br><a href="https://genome.ucsc.edu/encode/">https://genome.ucsc.edu/encode/</a>                      |
| Human reference genome NCBI build 37, GRCh37         | Genome Reference Consortium              | <a href="http://www.ncbi.nlm.nih.gov/projects/genome/assembly/grc/human/">http://www.ncbi.nlm.nih.gov/projects/genome/assembly/grc/human/</a> |
| <b>Experimental Models: Cell Lines</b>               |                                          |                                                                                                                                               |
| Human: HeLa                                          | N/A                                      | N/A                                                                                                                                           |
| Human: 2fTGH                                         | George Stark lab, Cleveland Clinic       | N/A                                                                                                                                           |
| Human 2fTGH-derived (-/- IRF9): U2A                  | George Stark lab, Cleveland Clinic       | U2A                                                                                                                                           |
| Human 2fTGH-derived (-/- STAT1): U3A                 | George Stark lab, Cleveland Clinic       | U3A                                                                                                                                           |
| Human 2fTGH-derived (-/-STAT2): U6A                  | George Stark lab, Cleveland Clinic       | U6A                                                                                                                                           |
| Human: 293T                                          | ATCC                                     | CRL-11268                                                                                                                                     |
| <b>Oligonucleotides</b>                              |                                          |                                                                                                                                               |
| Primers for RT and ChIP qPCR                         | Eurofins, Invitrogen                     | See Table S3                                                                                                                                  |
| <b>Recombinant DNA</b>                               |                                          |                                                                                                                                               |
| pUC-MDG (VSV-G pseudotyped viral envelope)           | Xiaomin Bao lab, Northwestern University | N/A                                                                                                                                           |
| pΔ8.91 (Lentiviral Gag, Pol)                         | Xiaomin Bao lab, Northwestern University | N/A                                                                                                                                           |
| pGIPZ shRNA                                          | GE Dharmacon                             | See Table S3 - Plasmids                                                                                                                       |
| <b>Software and Algorithms</b>                       |                                          |                                                                                                                                               |

|              |                         |                                                                                                                                                 |
|--------------|-------------------------|-------------------------------------------------------------------------------------------------------------------------------------------------|
| Bowtie       | (Langmead et al., 2009) | <a href="https://sourceforge.net/projects/bowtie-bio/files/bowtie/0.12.7/">https://sourceforge.net/projects/bowtie-bio/files/bowtie/0.12.7/</a> |
| MACS         | (Zhang et al., 2008)    | <a href="http://liulab.dfci.harvard.edu/MACS/">http://liulab.dfci.harvard.edu/MACS/</a>                                                         |
| DANPOS       | (Chen et al., 2013)     | <a href="https://sites.google.com/site/danposdoc/">https://sites.google.com/site/danposdoc/</a>                                                 |
| HOMER        | (Heinz et al., 2010)    | <a href="http://homer.ucsd.edu/homer/">http://homer.ucsd.edu/homer/</a>                                                                         |
| R            | R Development Core Team | <a href="https://www.r-project.org/">https://www.r-project.org/</a>                                                                             |
| <b>Other</b> |                         |                                                                                                                                                 |
| Galaxy       | (Afgan et al., 2016)    | Usegalaxy.org                                                                                                                                   |

#### **DATA AND SOFTWARE AVAILABILITY**

All deep sequencing data have been deposited in GEO under accession number GSE110067.

## SUPPLEMENTAL REFERENCES

Afgan, E., Baker, D., van den Beek, M., Blankenberg, D., Bouvier, D., Cech, M., Chilton, J., Clements, D., Coraor, N., Eberhard, C., *et al.* (2016). The Galaxy platform for accessible, reproducible and collaborative biomedical analyses: 2016 update. *Nucleic Acids Res* 44, W3-W10.

Chen, K., Xi, Y., Pan, X., Li, Z., Kaestner, K., Tyler, J., Dent, S., He, X., and Li, W. (2013). DANPOS: dynamic analysis of nucleosome position and occupancy by sequencing. *Genome Res* 23, 341-351.

ENCODE Project Consortium (2012). An integrated encyclopedia of DNA elements in the human genome. *Nature* 489, 57-74.

Freaney, J.E., Zhang, Q., Yigit, E., Kim, R., Widom, J., Wang, J.P., and Horvath, C.M. (2014). High-density nucleosome occupancy map of human chromosome 9p21-22 reveals chromatin organization of the type I interferon gene cluster. *J Interferon Cytokine Res* 34, 676-685.

Heinz, S., Benner, C., Spann, N., Bertolino, E., Lin, Y.C., Laslo, P., Cheng, J.X., Murre, C., Singh, H., and Glass, C.K. (2010). Simple combinations of lineage-determining transcription factors prime cis-regulatory elements required for macrophage and B cell identities. *Mol Cell* 38, 576-589.

Langmead, B., Trapnell, C., Pop, M., and Salzberg, S.L. (2009). Ultrafast and memory-efficient alignment of short DNA sequences to the human genome. *Genome Biol* 10, R25.

Yigit, E., Zhang, Q., Xi, L., Grilley, D., Widom, J., Wang, J.P., Rao, A., and Pipkin, M.E. (2013). High-resolution nucleosome mapping of targeted regions using BAC-based enrichment. *Nucleic Acids Res* 41, e87.

Zhang, Y., Liu, T., Meyer, C.A., Eeckhoute, J., Johnson, D.S., Bernstein, B.E., Nusbaum, C., Myers, R.M., Brown, M., Li, W., *et al.* (2008). Model-based analysis of ChIP-Seq (MACS). *Genome Biol* 9, R137.
